# Supplementary material for: High-yield graphene produced from the synergistic effect of inflated temperature and gelatin offers high stability and cellular compatibility
Source: Royal Society of Chemistry journal article supplement (doi:10.1039/c8cp02263a), 2018-01-01
Supplement: c8cp02263a1.pdf [file c8cp02263a1.pdf]

## **High Yield Graphene Production Arising from Synergistic Effect of Inflated Temperature and Gelatin Offers Higher Stability and Cellular Compatibility**

Pranav Tiwari<sup>a</sup>, Navpreet Kaur<sup>b</sup>, Vinay Sharma<sup>b</sup> and Shaikh M. Mobin<sup>a,b,c\*</sup>

<sup>a</sup>Discipline of Metallurgical Engineering and Material Science, <sup>b</sup> Discipline of Biosciences and Biomedical Engineering, <sup>c</sup>Discipline of chemistry, Indian Institute of Technology Indore, Simrol, Khandwa Road, Indore 453552, India

\* Corresponding author- [xray@iiti.ac.in](mailto:xray@iiti.ac.in)

## SUPPORTING INFORMATIONS

**Figure S1.** Effect of sonication on gelatin concentration by measuring UV spectra of gelatin solution with and without sonication.

**Figure S2.** Surface tension measurement of Water and Water-gel system measured at 24°C.

**Figure S3.** Effect of temperature increment on G production (a) Uv-vis spectra (b)  $A/l_{660}$  ( $\text{cm}^{-1}$ ) value of G-80C, G-70C and G-60C.

**Figure S4.** AFM image of exfoliated G sheets at various temperature (a) 80C (b) 70C (c) 60C (d) Lateral width of exfoliated G at varying temperature.

**Figure S5.** Effect of increase in total particle concentration on graphene yield by measuring  $A/l_{660}$  ( $\text{cm}^{-1}$ ) value.

**Figure S6.** Zeta potential of Ggel4 at different pH values.

**Figure S7.** Calibration plot of Ggel4 to calculate extinction coefficient at 660nm at pH7 in milliQ water.

**Figure S8.** 2D deconvoluted peak of Ggel4 (a) after 1 hrs sonication (b) 7 hrs sonication.

**Figure S9.** Circular dichroism spectra of gelatin solution and Ggel4.

**Figure S10.** Traces (DLS and Zeta Potential) for Ggel4 after 1 and 7 hrs sonication.

**Figure S11.** Colloidal stability of Ggel4 under different storage conditions (a) after 1 day (b) after 31 days.

**Figure S12.** SEM images of (a) Control RBCs (b) Ggel4 (1mg/mL) with RBCs (c) Ggel4 (10mg/mL) with RBCs.

**Table S1.** Effect of exfoliation condition, sonication applied for 2hrs .Then centrifugation at 4000 r.p.m. for 15minutes.

**Table S2.** Effect of Graphite to gelatin ratio, sonication applied for 7hrs with temperature maintained~60°C. Then centrifugation at 4000 r.p.m. for 15minutes.

**Table S3.** Effect of total particle concentration, sonication applied for 2hrs with temperature maintained~60°C. Then centrifugation at 4000 r.p.m. for 15minutes.

**Table S4.** Comparisons in G yield with variation in proteins and sonication condition.

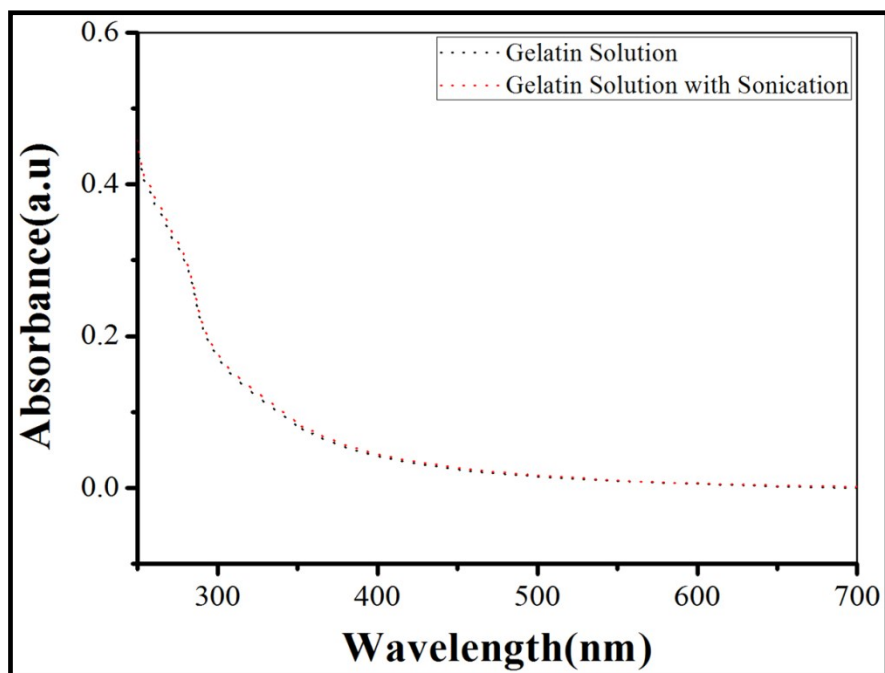

**Figure S1.** Effect of sonication on gelatin concentration by measuring UV spectra of gelatin solution with and without sonication.

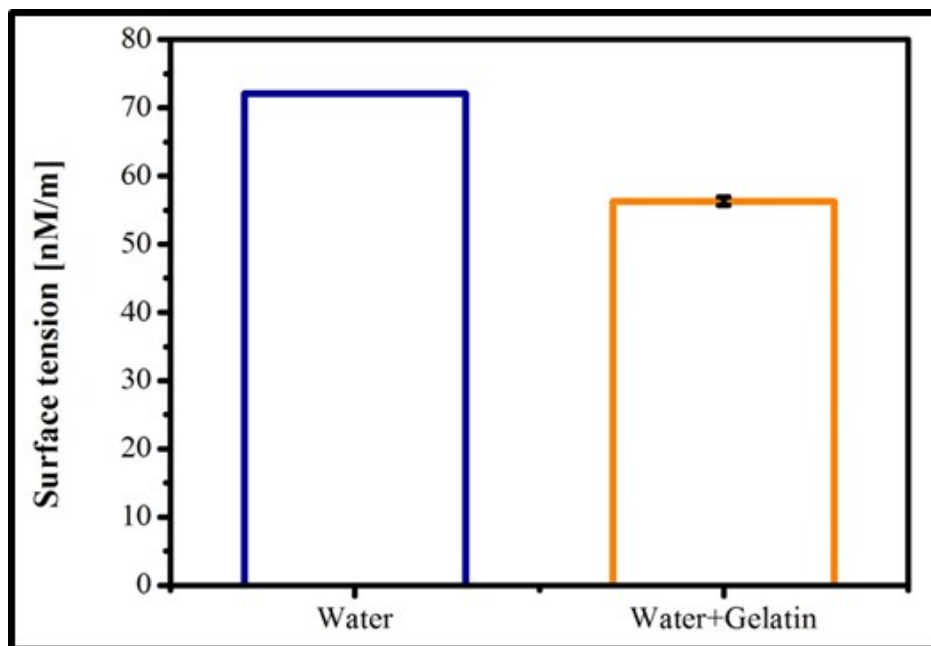

**Figure S2.** Surface tension measurement of Water and Water-gel system measured at 24°C.

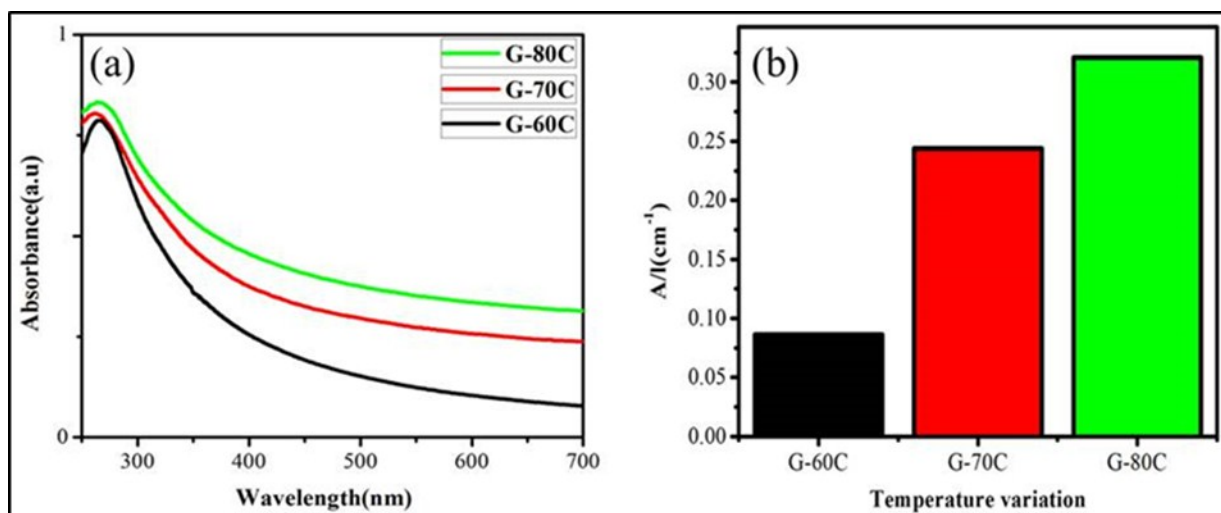

**Figure S3.** Effect of temperature increment on G production (a) Uv-vis spectra (b)  $A/I_{660}$  (cm<sup>-1</sup>) value of G-80C, G-70C and G-60C.

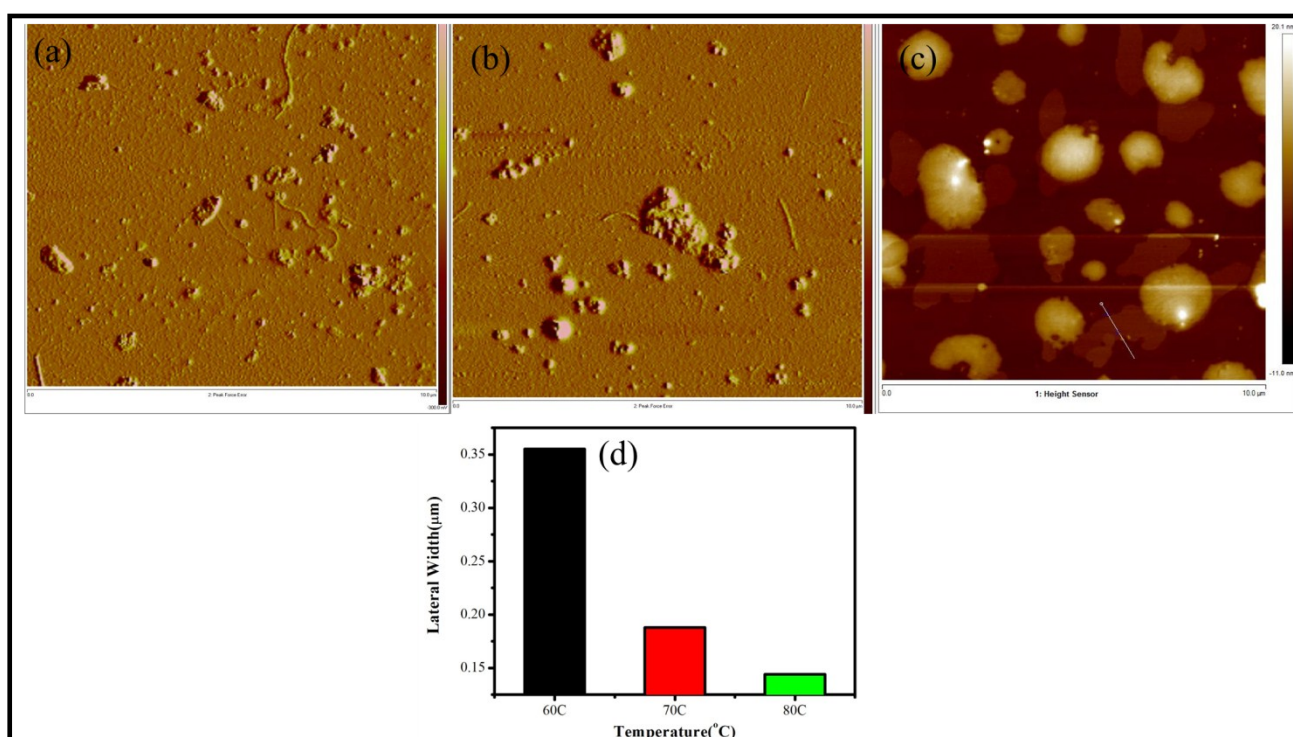

**Figure S4.** AFM image of exfoliated G sheets at various temperature (a) 80C (b) 70C (c) 60C (d) Lateral width of exfoliated G at varying temperature.

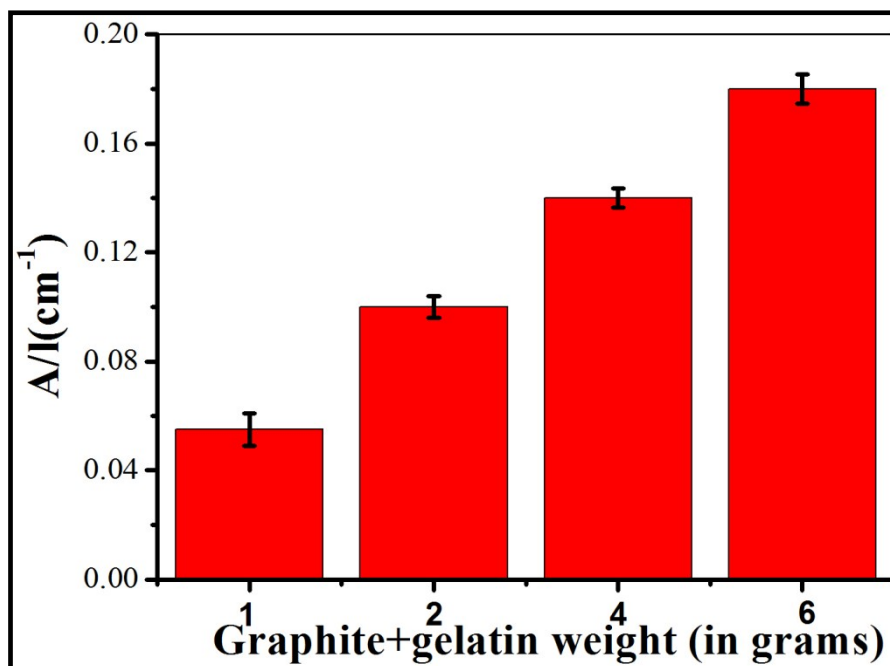

**Figure S5.** Effect of increase in total particle concentration on graphene yield by measuring  $A/I_{660}$  ( $\text{cm}^{-1}$ ) value.

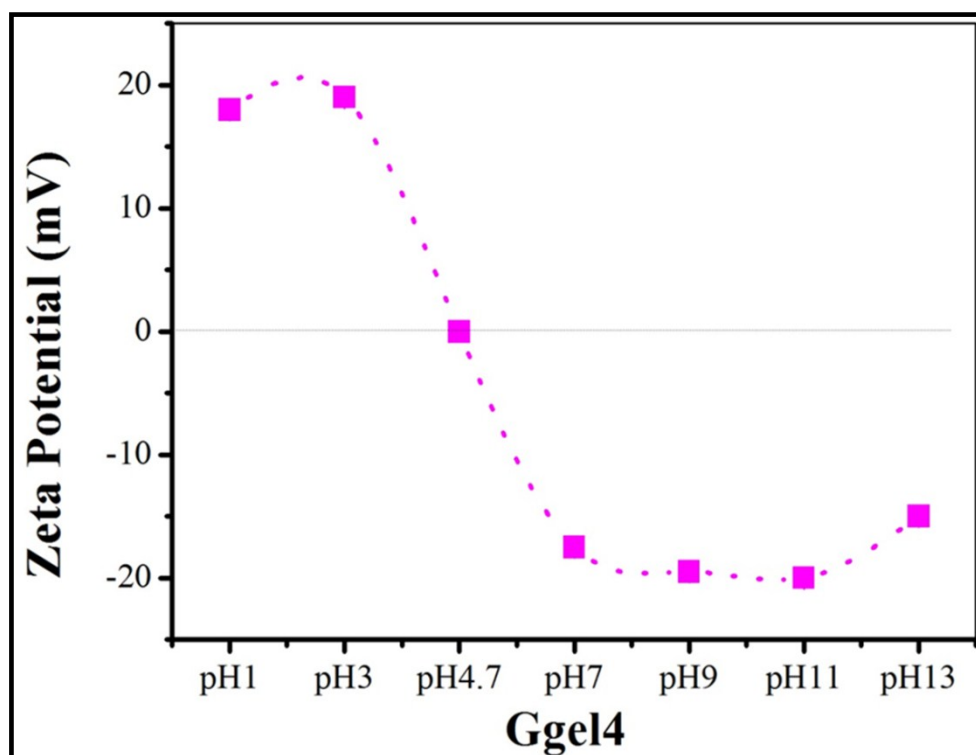

**Figure S6.** Zeta potential of Ggel4 at different pH values.

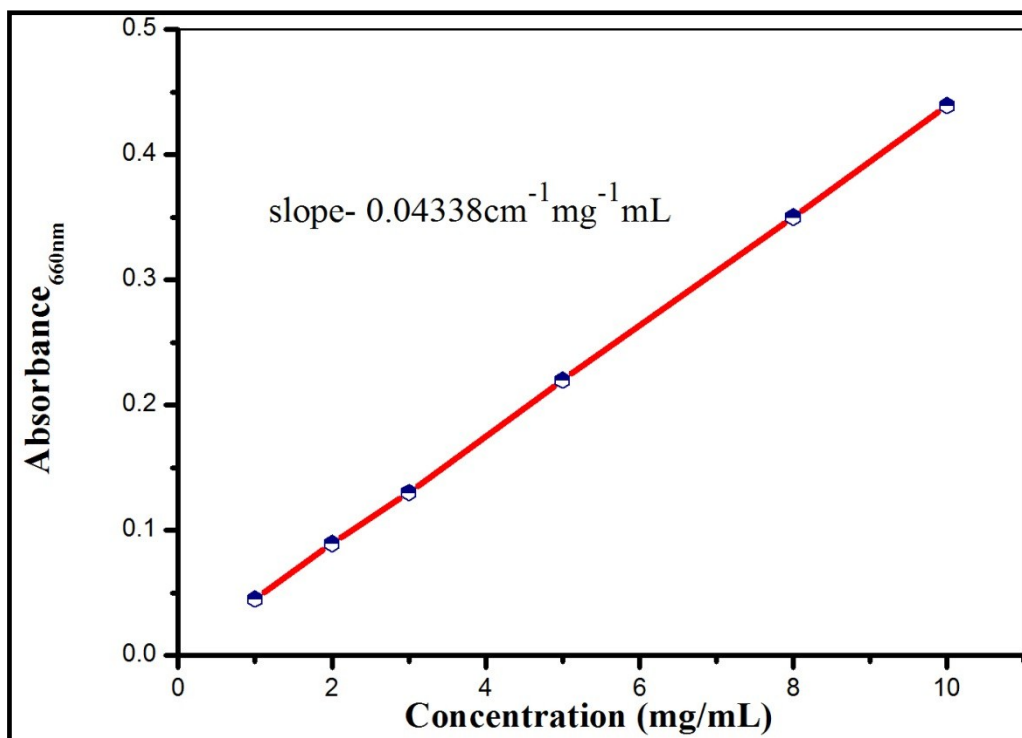

**Figure S7.** Calibration plot of Ggel4 to calculate extinction coefficient at 660nm at pH7 in milliQ water.

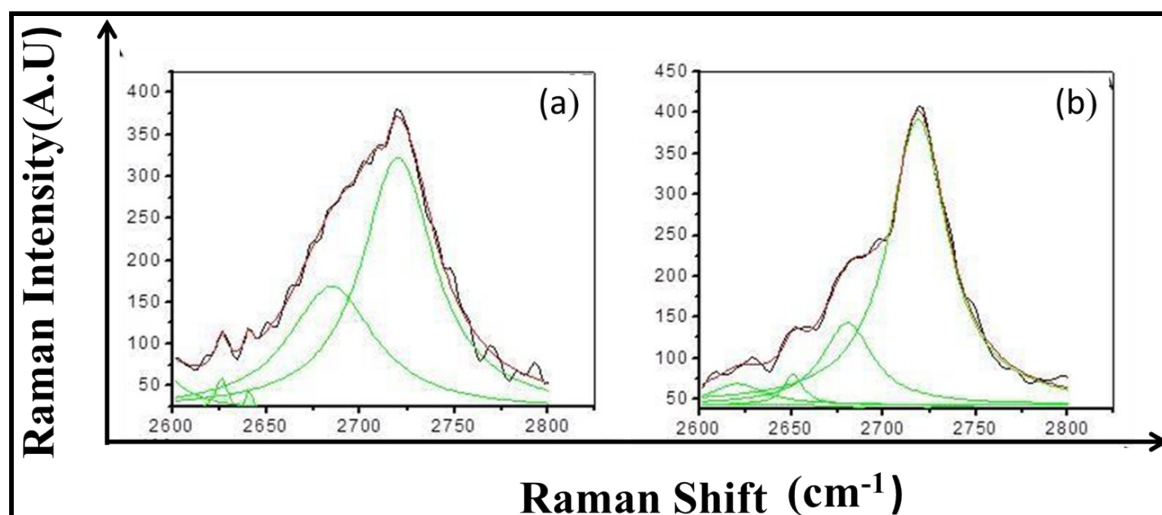

**Figure S8.** 2D deconvoluted peak of Ggel4 (a) after 1 hrs sonication (b) 7 hrs sonication.

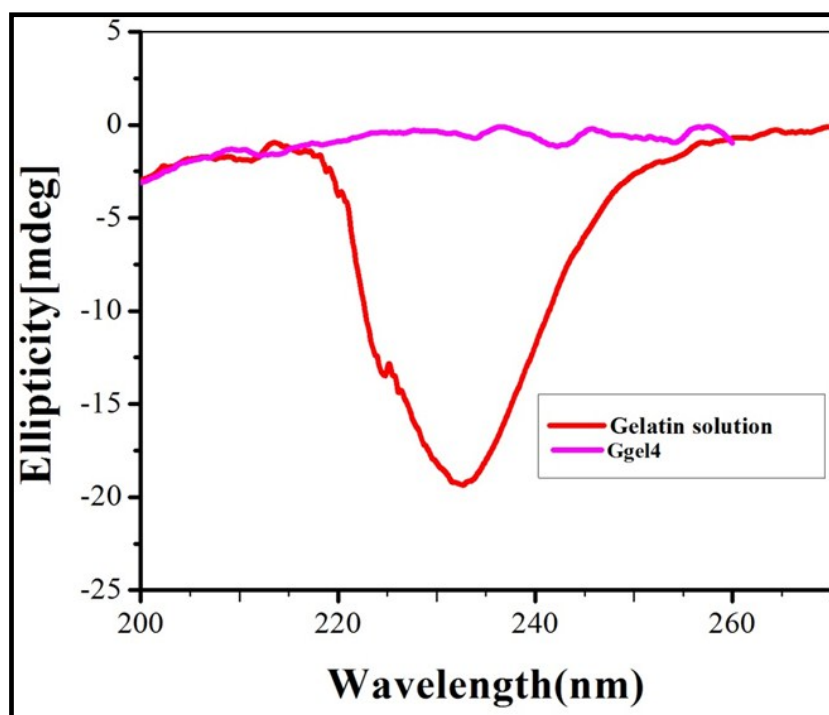

**Figure S9.** Circular dichroism spectra of gelatin solution and Ggel4.

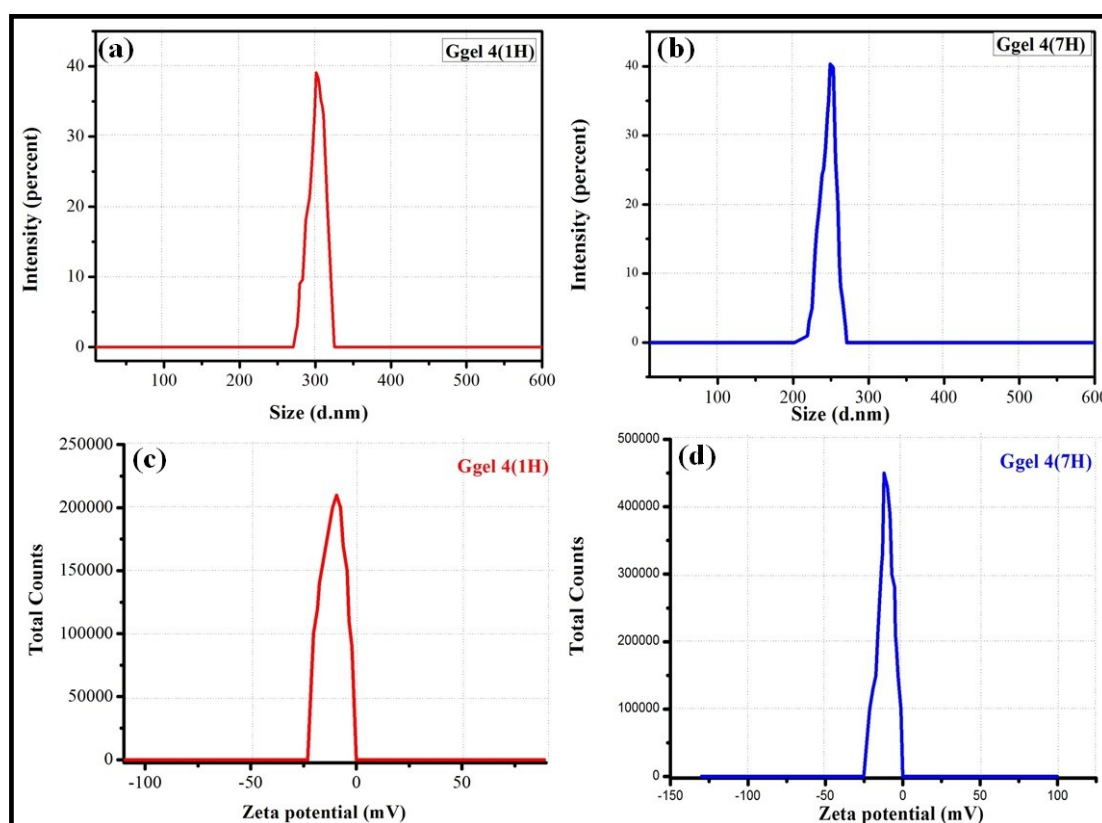

**Figure S10.** Traces (DLS and Zeta Potential) for Ggel4 after 1 and 7 hrs sonication (a) DLS of Ggel 4(1H) (b) DLS of Ggel4 (7H) (c) Zeta potential of Ggel 4(1H) (d) Zeta potential of Ggel4 (7H).

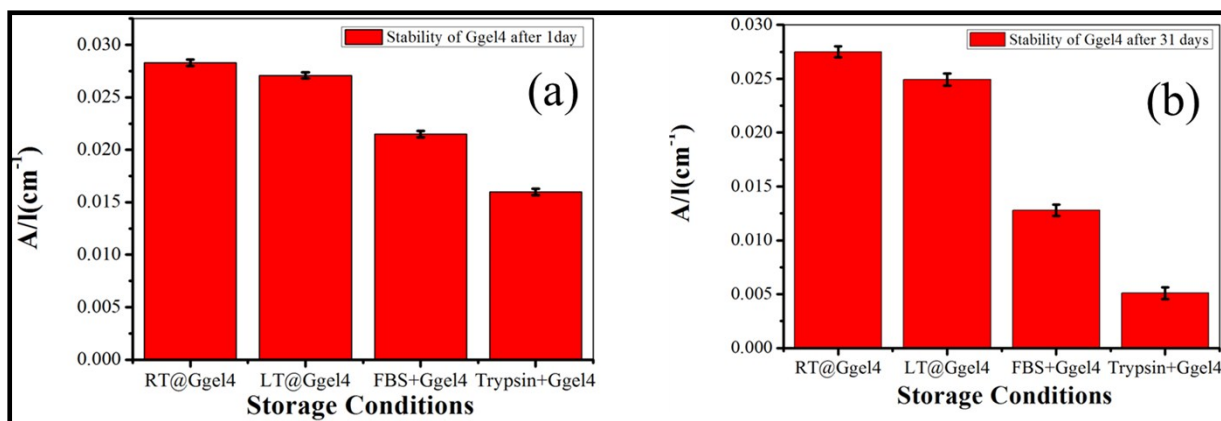

**Figure S11.** Colloidal stability of Ggel4 under different storage conditions (a) after 1 day (b) after 31 days.

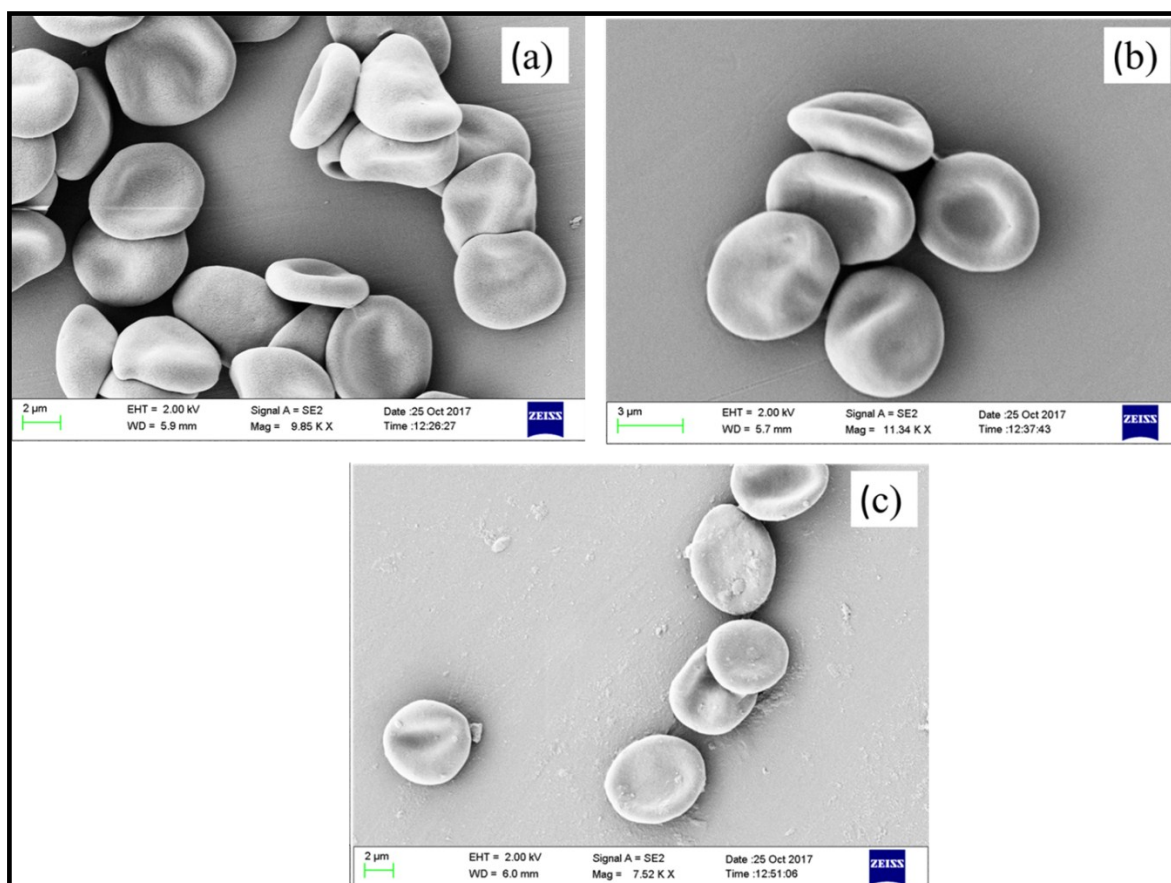

**Figure S12.** SEM images of (a) Control RBCs (b) Ggel4 (1mg/mL) with RBCs (c) Ggel4 (10mg/mL) with RBCs.



**Table S1.** Effect of exfoliation condition, sonication applied for 2hrs .Then centrifugation at 4000 r.p.m. for 15minutes.

| Sample                             | Graphite | Gelatin | Volume | Time | Temperature(°C) |
|------------------------------------|----------|---------|--------|------|-----------------|
| <b>No Sonicated(only stirring)</b> | 30mg     | 20mg    | 5mL    | 2hrs | -               |
| <b>Sonicated</b>                   | -do-     | -do-    | 5mL    | -do- | -               |
| <b>Sonicated with heating</b>      | -do-     | -do-    | 5mL    | -do- | 60              |

**Table S2.** Effect of Graphite to gelatin ratio, sonication applied for 7hrs with temperature maintained~60°C. Then centrifugation at 4000 r.p.m. for 15minutes.

| Sl no | Sample name | Graphite(mg) | Gelatin(mg) | Volume(mL) |
|-------|-------------|--------------|-------------|------------|
| 1.    | Ggel1       | 45           | 5           | 5          |
| 2.    | Ggel2       | 40           | 10          | -do-       |
| 3.    | Ggel3       | 35           | 15          | -do-       |
| 4.    | Ggel4       | 30           | 20          | -do-       |
| 5.    | Ggel5       | 25           | 25          | -do-       |

**Table S3.** Effect of total particle concentration, sonication applied for 2hrs with temperature maintained~60°C. Then centrifugation at 4000 r.p.m. for 15minutes.

| Sl no | Sample    | Graphite(mg) | Gelatin(mg) | Volume(mL) |
|-------|-----------|--------------|-------------|------------|
| 1.    | 1gm/100mL | 30           | 20          | 5          |
| 2.    | 2gm/100mL | 60           | 40          | -do-       |
| 3.    | 4gm/100mL | 120          | 80          | -do-       |
| 4.    | 6gm/100mL | 180          | 120         | -do-       |

**Table S4.** Comparison in G yield with variation in proteins and sonication condition

| Sln0 | Biomolecules<br>(Protein/Peptides) | Exfoliation condition                                        | Concentration<br>(mg/mL) | Applications | References                                         |
|------|------------------------------------|--------------------------------------------------------------|--------------------------|--------------|----------------------------------------------------|
| 1.   | HFBI                               | 40 min Bath sonication/Tip sonication<br>Temp= Not mentioned | 0.04                     | -            | <i>Angew. Chem. Int. Ed.</i> , 2010, 49, 4946–4949 |
| 2.   | Vmh2                               | Probe Sonication<br>Temp= Not mentioned                      | 0.5                      | -            | <i>Adv. Funct. Mater.</i> , 2015, 25, 2771–2779.   |

|    |                   |                                                                         |               |                                                                           |                                                 |
|----|-------------------|-------------------------------------------------------------------------|---------------|---------------------------------------------------------------------------|-------------------------------------------------|
| 3. | BSA               | 48hrs Bath sonication                                                   | 0.85          | -                                                                         | <i>J. Am. Chem. Soc.</i> , 2015, 137, 6152–6155 |
|    |                   | Temp= Not mentioned<br>3hrs Probe Sonication<br>Temp~25°C               | 0.8           | Biocompatible,<br>Used to increase conductivity of hydrophilic hydrogels. | <i>Nanoscale</i> , 2015, 7, 6436–6443.          |
| 4. | Lysozyme          | 6 hrs Probe Sonication                                                  | 2.09          | <i>Anti-cancerous</i>                                                     | <i>RSC Adv.</i> , 2013, 4, 4085–4093            |
|    |                   | Temp= Not mentioned<br>150 min Probe sonication                         | 0.18          | <i>Catalytic activity towards reduction of o-nitroaniline</i>             | <i>Nano Res.</i> , 2013, 6, 693–702             |
| 5. | Calf histone      | Not mentioned                                                           | Not mentioned | -                                                                         | <i>RSC Adv.</i> , 2013, 4, 4085–4093            |
| 6. | Amphilic Peptides | 24 hrs Bath Sonication<br>Temp=<65°C                                    | 0.03          | -                                                                         | <i>J. Mater. Chem. B</i> , 2015, 4, 152–161     |
| 7. | Liposomes         | 2 hrs Sonication<br>Temp= Not mentioned                                 | 0.124±0.010   | Anti-bacterial activities                                                 | <i>J. Mater. Chem. B</i> , 2015, 3, 6520        |
| 8. | Gelatin           | 7 hrs Bath Sonication,<br>(Gr: gel 60:40)total concentration(1gm/100mL) | 4.37          | Biocompatible and Hemocompatible                                          | Present Work                                    |
|    |                   | 2hrs Bath Sonication,<br>(Gr: gel 60:40)total concentration(6gm/100mL)  | 4.14          |                                                                           | Present Work                                    |
